## **Genetic basis of phenotypic plasticity and genotype x environment interaction in a multi-parental population**

Isidore Diouf<sup>1</sup>, Laurent Derivot<sup>2</sup>, Shai Koussevitzky<sup>3</sup>, Yolande Carretero<sup>1</sup>, Frédérique Bitton<sup>1</sup>, Laurence Moreau<sup>4</sup>, Mathilde Causse<sup>1</sup>

<sup>1</sup>INRAE, GAFL, 84143, Monfavet, France<sup>2</sup>GAUTIER Semences, route d'Avignon, Eyragues, 13630, France

<sup>3</sup>Hazera – Seeds of Growth, Berurim M.P Shikmim, 7983700, Israel

<sup>4</sup>UMR GQE-Le Moulon, INRA, CNRS, AgroParisTech, Université Paris-Saclay, F-91190, Gif-sur-Yvette, France

### **Correspondence:**

Mathilde Causse, INRA, UR1052, Génétique et Amélioration des Fruits et Légumes, 67 Allée des Chênes, Centre de Recherche PACA, Domaine Saint Maurice, CS60094, Monfavet, 84143, France

Email: [mathilde.causse@inra.fr](mailto:mathilde.causse@inra.fr)

1 **Running Title**

2 QTL for plasticity in tomato.

3 **Highlight**

4 The genetic architecture of tomato response to several abiotic stresses is deciphered. QTL  
5 for plasticity and QTL x Environment were identified in a highly recombinant MAGIC  
6 population.

7 **Date of submission** : February 7<sup>th</sup> 2020

8 **Number of Figures** : 6

9 **Number of words** : 6943

10 **Number of supplementary data** : 7 tables and 11 figures

11 **Abstract (180 words)**

12 Deciphering the genetic basis of phenotypic plasticity and genotype x environment  
13 interaction (GxE) is of primary importance for plant breeding in the context of global climate  
14 change. Tomato is a widely cultivated crop that can grow in different geographical habitats  
15 and which evinces a great capacity of expressing phenotypic plasticity. We used a multi-  
16 parental advanced generation intercross (MAGIC) tomato population to explore GxE and  
17 plasticity for multiple traits measured in a multi-environment trial (MET) design comprising  
18 optimal cultural conditions and water deficit, salinity and heat stress over 12 environments.  
19 Substantial GxE was observed for all the traits measured. Different plasticity parameters  
20 were estimated through the Finlay-Wilkinson and factorial regression models and used  
21 together with the genotypic means for quantitative trait loci (QTL) mapping analyses. Mixed  
22 linear models were further used to investigate the presence of interactive QTLs (QEI). The  
23 results highlighted a complex genetic architecture of tomato plasticity and GxE. Candidate  
24 genes that might be involved in the occurrence of GxE were proposed, paving the way for  
25 functional characterization of stress response genes in tomato and breeding for climate-  
26 adapted crop.

27

28

29 **Keywords:** Tomato, MAGIC population, phenotypic plasticity, genotype x environment  
30 interaction (GxE), abiotic stresses, QTL.

## 31 INTRODUCTION

32 Plants are sessile organisms which have to cope with environmental fluctuations to ensure  
33 species reproduction for persistence in nature. For a given genotype, the expression of  
34 different phenotypes according to the growing environment is commonly called phenotypic  
35 plasticity (PP) (Bradshaw, 1965). It offers the possibility to plants to adapt to new  
36 environments, notably new locations, changes in climatic conditions or seasonal variations.  
37 In agriculture, the range of environmental variation for crop cultivation may also include  
38 different cultural practices or growing conditions, leading to the expression of PP on  
39 agronomic traits and unstable performance. When different genotypes/accessions are  
40 examined for PP within a species, inter-individual variations in their responses usually lead to  
41 the common phenomenon of genotype-environment (GxE) interaction (El-Soda et al., 2014).  
42 Understanding the genetic mechanisms driving PP and GxE in plants is a crucial step for  
43 being able to predict yield performance of crop cultivars and to adapt breeding strategies  
44 according to the targeted environments.

45 In plants, the genetic basis of PP has been investigated to assess whether PP has its own  
46 genetic regulation and thus could be directly selected. Three main genetic models, widely  
47 known as the over-dominance, allelic-sensitivity and gene-regulatory models were proposed  
48 in the literature as underlying plant PP (Scheiner, 1993; Via et al., 1995). The over-  
49 dominance model suggests that PP is negatively correlated to the number of heterozygous  
50 loci (Gillespie and Turelli, 1989). The heterozygous status is favored by allele's  
51 complementarity in this case. Allelic-sensitivity and gene-regulatory models are assumed to  
52 arise from the differential expression of an allele according to the environment and epistatic  
53 interactions between structural and regulatory alleles, respectively. The latter assumes an  
54 independent genetic control of mean phenotype and plasticity of a trait. Using a wide range  
55 of environmental conditions, the prevalence of the allelic-sensitivity or gene-regulatory  
56 model in explaining the genetic architecture of PP was explored in different crop species  
57 including barley (Lacaze et al. 2009), maize (Gage et al., 2017; Kusmec et al., 2017), soybean  
58 (Xavier et al., 2018) and sunflower (Mangin et al., 2017).

59 Quantification of PP is however a common question when analyzing the genetic architecture  
60 of plasticity since different parameters for PP estimation are available as reviewed by  
61 Valladares et al. (2006). At a population level, when multiple genotypes are screened in

62 different environments, different approaches can be used to assess plasticity (Laitinen and  
63 Nikoloski, 2019). The most common of these approaches is the joint regression model (Finlay  
64 and Wilkinson, 1963) that uses the average performance of the set of tested genotypes in  
65 each environment as an index on which the individual phenotypes are regressed. This  
66 model, commonly known as the Finlay-Wilkinson regression model, allows to estimate linear  
67 (slopes) and non-linear plasticity parameters (from the residual errors) that presumably have  
68 different genetic basis (Kusmec et al., 2017). If the detailed description of the environments  
69 is available, the environmental index used in the Finlay-Wilkinson regression model can be  
70 replaced by environmental covariates such as stress indexes through factorial regression  
71 models (Malosetti et al. 2013). Thus plasticity could be estimated as the degree of sensitivity  
72 to a given stress continuum (Mangin et al., 2017).

73 Climate change is predicted to increase the frequency and intensity of abiotic stresses with a  
74 high and negative impact on crop yield (Zhao et al., 2017). Plants respond to abiotic stresses  
75 by altering their morphology and physiology, reallocating the energy for growth to defense  
76 against stress (Munns and Gilliham, 2015). Consequences on agronomic performances are  
77 apparent and detrimental to productivity. The most common abiotic stresses studied across  
78 species are water deficit (WD), salinity stress (SS) and high temperature stress (HT). The  
79 negative impact of these stresses on yield have been underlined for major cultivated crops;  
80 however, positive effects of WD and SS on fruit quality have been observed in fruit trees and  
81 some vegetables notably in tomato (Costa et al. 2007; Mitchell et al. 1991; Ripoll et al. 2014).

82 Tomato is an economically important crop and a plant model species which led to numerous  
83 studies that contributed much in understanding the genetic architecture of the crop and its  
84 response to environmental variation. However, most of the studies that addressed the  
85 genetic architecture of tomato response to environment were conducted on experimental  
86 populations exposed to two conditions (*i.e.* control vs stress). Albert et al. (2018) for  
87 example identified different WD-response quantitative trait loci (QTL) in a bi-parental  
88 population derived from a cross of large and cherry tomato accessions. Tomato heat-  
89 response QTLs were also identified in different experimental populations including  
90 interspecific and intraspecific populations (Grilli et al., 2007; Xu et al., 2017a; Driedonks et  
91 al., 2018). These studies investigated heat-response QTLs using mostly reproductive traits  
92 screened under heat stress condition. Villalta et al. (2007) and Diouf et al. (2018)

93 investigated the genetic architecture of tomato response to SS and identified different QTLs  
94 for physiological and agronomic traits, involved in salinity tolerance. However, no QTL study  
95 has yet been conducted on tomato plasticity assessed under a multiple stress design,  
96 although the coincidence of different stresses is a more realistic scenario in crop cultivation,  
97 especially with the climate change.

98 Tomato benefits of a large panel of genetic resources that have been used in multiple  
99 genetic mapping analyses (Grandillo et al. 2013). Bi-parental populations were first used in  
100 QTL mapping and permitted the characterization of plenty of QTLs related to yield, disease  
101 resistance and fruit quality. In the genomic era, new experimental populations were  
102 developed offering higher power and advantages for QTL detection. These include mutant  
103 collections, BIL-populations and multi-parent advanced generation intercross (MAGIC) as  
104 described in Rothan et al. (2019). The first tomato MAGIC population was developed at  
105 INRA-Avignon in France and is composed of about 400 lines derived from an 8-way cross  
106 (Pascual et al. 2015). This population showed a wide intra-specific genetic variation under  
107 control and stress environments and is highly suitable for mapping QTLs (Diouf et al., 2018).

108 In the present study, we used the 8-way tomato MAGIC population described above and  
109 evaluated its response in a multi-environment trial (MET) design. The population was grown  
110 in 12 environments including control and several stress conditions (WD, SS and HT), and  
111 agronomic traits related to yield, fruit quality, plant growth and phenology were measured.  
112 Different plasticity parameters were computed and used together with mean phenotypes to  
113 decipher the genetic control of response to environmental variation. Multi-environment QTL  
114 analysis was performed in addition to detection of interactive QTLs (QEI) along with QTL  
115 mapping for plasticity traits.

116

## 117 **MATERIALS AND METHODS**

### 118 **Plant material and phenotyping**

119 The MAGIC population was derived from a cross between eight parental lines that belong to  
120 *Solanum lycopersicum* and *Solanum lycopersicum cerasiforme* groups. More details about  
121 the population development can be found in Pascual et al. (2015). Briefly, the population

122 was composed of about 400 8-way MAGIC lines that underwent three generations of selfing  
123 before greenhouse evaluations were carried out. In this study, a subset of 241 to 397 lines  
124 was grown in each environment (Supplemental Table 1).

125 The full genome of each parental line was re-sequenced and their comparison with the  
126 reference tomato genome ('Heinz 1706') yielded 4 millions SNPs (Causse et al., 2013). From  
127 these polymorphisms, a genetic map of 1345 discriminant SNPs was developed (Pascual et  
128 al., 2015) and used in the present study for the QTL analysis.

### 129 **Experimental design**

130 The MAGIC population was grown in three different geographical regions (France, Israel and  
131 Morocco) and four specific stress treatments were applied. Trials were conducted in order  
132 that in a given trial any stress treatment was applied aside a control trial (Supplemental  
133 Table 1). Treatments consisted in water deficit (WD), two levels of salinity – considered here  
134 as low salinity (LS) and high salinity (HS) – and high temperature (HT) stress. Water deficit  
135 was applied by reducing the water irrigation of about 70% and 30% according to the  
136 reference evapotranspiration in Israel in 2014 and 2015, respectively and by 50% in Morocco  
137 in 2015. Salinity treatment was managed as described in Diouf et al. (2018) and the average  
138 electrical conductivity of the substrate ( $E_c$ ) in Morocco 2016 was 3.76 and 6.50  $dS.m^{-1}$  for LS  
139 and HS, respectively; while the  $E_c$  in the control condition in Morocco 2015 was about 1.79  
140  $dS.m^{-1}$ . For HT stress, plants were sown during the late spring and phenotyped in the  
141 summer 2014 in Israel (HIs14) and summer 2017 in France (HAvi17). During HT treatments,  
142 greenhouse vent opening was managed all along the entire growing season, with opening  
143 the vent only when temperatures rose up to 25°C. Average mean (respectively maximal)  
144 temperatures calculated on daily (24 hours) measurements were of 26°C (respectively 34°C)  
145 for HAvi17 and 33°C (respectively 48°C) for HIs14. Besides stress treatments, local  
146 conventional cultural conditions were applied for control treatments as described in Diouf et  
147 al., (2018).

148 Environments were considered as any combination of a geographical region, a year of trial  
149 and an applied treatment (Supplemental Table 1). Climatic sensors were installed in the  
150 greenhouses and climatic parameters recorded hourly in all environments. From the climatic  
151 parameters, seven environmental covariates were defined (Supplemental Figure 1) including

152 temperature parameters (mean, minimal and maximal daily temperatures and thermal  
153 amplitude), the sum of degree-day (SDD), the vapour-pressure-deficit (Vpd in kPa) and the  
154 relative humidity (RH) within the greenhouse. To characterize the environments, every  
155 covariate was calculated during the period covering flowering time of the population on the  
156 fourth truss. Indeed, phenotypic data analyzed here were mostly recorded on the fourth and  
157 fifth trusses (Supplemental Table 2). Hierarchical clustering was performed with  
158 'FactoMineR' R package (Lê et al., 2008) using the environmental parameters to group  
159 environments according to their similarity regarding the within-greenhouse climatic  
160 conditions.

161 The MAGIC population, the eight parental lines and the four first generation hybrids (one  
162 hybrid per two-way cross) were evaluated for fruit weight (FW) by measuring the average  
163 FW of the third and/or fourth plant truss in each environment. Phenotypic data were  
164 recorded across the different environments for nine supplemental traits related to fruit  
165 quality – fruit firmness (firm) and soluble solid content (SSC); plant phenology –  
166 flowering time (flw), number of flowers (nflw) and fruit setting (fset); plant development –  
167 stem diameter (diam), leaf length (leaf) and plant height (height) and fruit number (nfr).  
168 Details about the phenotyping measurements are in Supplemental Table 2. At least two  
169 plants per MAGIC line were replicated in each environment except in Avi17 (control  
170 condition) where the average phenotype was recorded from single plant measurements.  
171 Parents and hybrids had more replicates per genotype (at least two) and served as control  
172 lines to measure within-environment heterogeneity.

### 173 **Evaluation of GxE and heritability**

174 Data were first analyzed separately in each environment to remove outliers and correct for  
175 spatial heterogeneity within the environment. The model (1) below was applied to test for  
176 micro-environmental variation within the greenhouse where  $y_{ijk}$  represents the phenotype  
177 of the individual  $i$ , located in row  $j$  and position  $k$  in the greenhouse;  $\mu$  is the overall mean;  $C_i$   
178 and  $L_i$  represent the fixed effect of control lines and the random effect of the MAGIC lines,  
179 respectively. In this model,  $t_i$  is an index of 0 or 1, defined to distinguish between control  
180 and MAGIC lines;  $\varepsilon_{ijk}$  is the random residual error.

$$181 \quad y_{ijk} = \mu + C_i \cdot t_i + L_i \cdot (1 - t_i) + R_j + P_k + \varepsilon_{ijk} \quad (1)$$

182 For every trait where row ( $R_j$ ) and/or position ( $P_k$ ) effects were significant, required  
183 corrections were applied by removing the BLUP of the significant effects from the raw data.  
184 Corrected data were gathered and used in model (2) in order to estimate the broad-sense  
185 heritability ( $H^2$ ) and the proportion of variance associated to the GxE ( $prop. \sigma^2_{GxE}$ ).

$$186 \quad y_{ij} = \mu + E_j + C_i \cdot t_i + CxE_{ij} \cdot t_i + L_i \cdot (1 - t_i) + LxE_{ij} \cdot (1 - t_i) + \varepsilon_{ij}$$

187 (2)

188 In model (2),  $y_{ij}$  represents the phenotype of the individual  $i$ , in environment  $j$ ;  $\mu$ ,  $C_i$ ,  $L_i$  and  
189 the  $t_i$  index are as described in model (1);  $CxE_{ij}$  and  $LxE_{ij}$  are the fixed control lines x  
190 environment interaction effect and the random MAGIC lines x environment interaction  
191 effect, respectively. Within a given environment, random residuals error terms were  
192 assumed to be independent and identically distributed with a variance specific to each  
193 environment. From this model, the proportion of the total genotypic and GxE variance  
194 explained by the model was calculated as the following formula:  $prop. \sigma^2_{GxE} =$   
195  $\sigma^2_{LxE} / (\sigma^2_L + \sigma^2_{LxE})$ . The significance of GxE was tested with a likelihood ratio test (at 5%  
196 level) between the models with and without GxE. The broad-sense heritability at the whole  
197 design level ( $H^2$ ) was derived from variance components of model (2) and calculated as the  
198 following:  $H^2 = \sigma^2_L / (\sigma^2_L + \frac{\sigma^2_{LxE}}{nb.E} + \frac{\sigma^2_E}{nb.R})$ , where  $\sigma^2_L$  and  $\sigma^2_{LxE}$  are the variance  
199 components associated to the MAGIC lines and MAGIC lines x environment interaction  
200 effects, respectively. Here  $nb.E$  and  $nb.R$  represent the number of environments (e.g. 12  
201 for FW) and the average number of replicates over the whole design;  $\sigma^2_E$  is the average  
202 environmental variance (i.e.  $\sum \sigma^2_{Ej} / nb.E$ ).

### 203 **Phenotypic plasticity**

204 Three different parameters of plasticity were estimated using the Finlay-Wilkinson  
205 regression (3) and a factorial regression (4) models.

206 In model (3),  $y_{ij}$  is the phenotype (average values per environment and genotype) and  $\mu$  the  
207 general intercept.  $G_i$  and  $E_j$  are the effects of the MAGIC line  $i$  and environment  $j$ ,  
208 respectively and  $\beta_i$  represents the regression coefficient of the model. It measures individual  
209 genotypic sensitivity to the environment.



210 
$$y_{ij} = \mu + G_i + \beta_i x E_j + \varepsilon_{ij} \quad (3)$$

211 Environments are described here as an index that represents the ‘quality’ of the  
212 environment (*i.e.* the average performance of all genotypes in a given environment). The  $\varepsilon_{ij}$   
213 are the error terms including the GxE and  $\varepsilon_{ij} \sim N(0, \sigma^2 R)$ . From model (3), three parameters  
214 were estimated: (i) the genotypic means that is equivalent to the sum ( $\mu + G_i$ ) representing  
215 the average performance of a genotype considering all environments; (ii) the  $\beta_i$  terms (slope),  
216 corresponding to genotypic responses to the environments and the variance (VAR) of the  $\varepsilon_{ij}$   
217 terms that is a measurement of non-linear plasticity (Kusmec et al., 2017). All these  
218 parameters were used then to characterize the genotypes according to their individual  
219 performance and their stability in the MAGIC-MET design. For every trait, reaction norms  
220 were then computed from the model (3).

221 The factorial regression model (4) was further applied to describe the GxE through the  
222 genotypic response to the different environmental covariates (Tmin°, Tmax°, Tm°, Amp.Th°,  
223 Vpd, RH and SDD). The environmental covariates defined from the daily recorded climatic  
224 variables in the greenhouses were used for this purpose. For each trait, the most significant  
225 environmental covariate (p-value significant at  $\alpha = 5\%$ ) was first identified – by testing  
226 successively the significance of each single covariate – and used as an explanatory variable  
227 represented by  $Cv_j$  in model (4).

228 
$$y_{ij} = \mu + G_i + E_j + \alpha_i x Cv_j + \varepsilon_{ij} \quad (4)$$

229 The  $\alpha_i$  terms of the model were extracted and considered as a third plasticity parameter  
230 (SCv). They represent genotypic sensitivities to the most impacting environmental covariate  
231 for each trait. This measurement of plasticity is of interest as it allows identifying the  
232 direction and the intensity of each MAGIC line’s sensitivity to a meaningful environmental  
233 covariate. Throughout the rest of the document, the ‘slope’ and ‘VAR’ estimated from the  
234 Finlay-Wilkinson model and the ‘SCv’ from the factorial regression model will be considered  
235 as plasticity phenotypes – all of these parameters being trait-specific.

### 236 **Linkage mapping on the genotypic mean and plasticity phenotypes**

237 Linkage mapping was carried out with a set of 1345 SNP markers selected from the genome  
238 resequencing of the eight parental lines. All the MAGIC lines were genotyped for those SNPs

239 and at each SNP position, the founder haplotype probability was predicted with the function  
240 *calc\_genoprob* from R/qrtl2 package (Broman et al., 2019). Founder probabilities were then  
241 used with the Haley-Knott regression model implemented in R/qrtl2 for QTL detection. The  
242 response variables were the genotypic means, slope, VAR and SCv for each trait. To attest  
243 for significance, the threshold for all phenotypes was set to a LOD threshold of  $-\log_{10}$   
244  $(\alpha/\text{number of SNPs})$  where  $\alpha$  was fixed at 5% risk level. The VAR plasticity parameter was log  
245 transformed for all traits except fset (sqrt transformation) to meet normality assumption  
246 before QTL analysis. The function *find\_peaks* () of R/qrtl2 package was used to detect all  
247 peaks exceeding the defined threshold and the LOD score was dropped of two and one units  
248 to separate two significant peaks as distinct QTLs and to define the confidence interval of  
249 the QTLs, respectively.

### 250 **Multi-environment QTL analysis (QEI)**

251 The strength of QTL dependence on the environment was tested afterward in a second step  
252 by identifying QTLs that significantly interact with the environment (QEI). Two multi-  
253 environment forward-backward models (5 & 6) were used to test at each marker position  
254 the effect of the marker x environment interaction.

$$255 \quad y_{ij} = \mu + E_j + \sum_{p=1}^8 \alpha_{kp} * x_{ikp} + \sum_{p=1}^8 \beta_{kpj} * x_{ikp} + G_i + \varepsilon_{ij} \quad (5)$$

$$256 \quad y_{ij} = \mu + E_j + \sum_{p=1}^8 \beta_{kpj} * x_{ikp} + G_i + \varepsilon_{ij} \quad (6)$$

257 For model (5) and (6),  $y_{ij}$  represents the phenotype (mean value per genotype and per  
258 environment),  $E_j$  reflects the fixed environment effect;  $\alpha_{kp}$  and  $\beta_{kpj}$  represent the main and  
259 interactive parental allelic effects ( $p$ ) at marker  $k$  and in environment  $j$  for  $\beta_{kpj}$ ;  $x_{ikp}$  is the  
260 probability of the parental allele's origin for the MAGIC line  $i$ ;  $G_i$  stands for a random  
261 genotype effect and the residual errors including a part of the GxE that is not explained by  
262 the detected QTLs are specific to each environment,  $\varepsilon_{ij} \sim N(0, \sigma^2 R_j)$ .

263 Significant QEI were declared in a two-step procedure. First, the main QTL and the QEI  
264 effects were tested separately in model (5). The QTL detection process was adapted from  
265 the script proposed by Giraud et al., (2017). Every marker showing a significant main QTL or  
266 QEI was added as a fixed cofactor and the significance of the remaining markers tested again

267 until no more significant marker was found. All markers selected as cofactors were then  
268 jointly tested in the backward procedure and only significant QEI after the backward  
269 selection are reported. The second procedure used in model (6) to declare QEI consisted in a  
270 slight modification of model (5) where  $\beta_{kpj}$  represents this time the global (main +  
271 interactive) effect of the marker. It allowed the detection of markers that had a main QTL  
272 effect or QEI just below the threshold detection but whose global effect is significant when  
273 the two components are jointly tested. To determine the threshold level for QEI detection,  
274 permutation test were performed 1000 times on the adjusted means with the function  
275 *sim.sightr* of mpMap 2.0 R package (Huang and George, 2011).

#### 276 **Data availability:**

277 The phenotypic data, average climatic parameters and genotypic information described in  
278 the present study are available at <https://doi.org/10.15454/UVZTAV>. The custom scripts  
279 used for the two-stage analysis and QEI modelling are also provided.

280

## 281 **RESULTS**

### 282 **Environment description**

283 The 12 environmental conditions were described by the daily climatic parameters recorded  
284 until the end of flowering of the 4<sup>th</sup> truss. Seven environmental covariates were selected,  
285 and the environments clustered according to these covariates in four groups (Figure 1). The  
286 first group included all trials from Morocco that were characterized by high thermal  
287 amplitude and low Vpd. The control environments in France (Avi12 and Avi17) clustered  
288 together in the 2<sup>nd</sup> group, defined by low maximal temperatures and high relative humidity.  
289 Hls14 clustered alone in the 4<sup>th</sup> group and formed the most extreme environment showing  
290 very high temperatures and dry climate with low relative humidity. The remaining  
291 environments clustered together in the 3<sup>rd</sup> and most disparate group.

292 Phenotypic distributions were plotted for each trait regarding the environments where it  
293 was evaluated (Supplemental Figure 2) showing a distribution in accordance with the  
294 clustering of the environments for some traits (firm, height, nflw and leaf). Other traits such

295 as FW, nfr, SSC and fset showed a distribution pattern with relatively high within-group  
296 variability, notably for environments clustering in group 1 from Morocco.

### 297 **GxE in the MAGIC population**

298 Genotype x environment interaction analysis was carried out after correcting data for micro-  
299 environmental heterogeneity and removing outliers. As a first step, variance analysis was  
300 conducted with ASReml-R package and the variance components from model (2) used to  
301 estimate the proportion of GxE variance ( $prop. \sigma^2_{GxE}$ ) and heritability at the whole design  
302 level ( $H^2$ ). Significant GxE was found for every trait and the  $prop. \sigma^2_{GxE}$  varied from 0.15  
303 (for nflw) to 0.68 (for leaf). Although GxE was significant, seven out of the ten measured  
304 traits showed a higher proportion of genotypic variance compared to GxE (Supplemental  
305 Table 3). The broad-sense heritability of the whole design  $H^2$  was largely variable according  
306 to the trait, varying from 0.18 (nfr) to 0.77 (flw). Its calculation took into account the residual  
307 environment-specific variance which showed different range according to the trait, lowering  
308 heritability of traits such as nfr and fset (Supplemental Table 3). Furthermore,  $H^2$  at the  
309 whole design level was lower than the heritability computed in single environment  
310 (Supplemental Figure 3).

311 Afterwards, the proportion of the GxE that could be predicted by the environmental  
312 covariates was assessed following the factorial regression model (4). Across traits, different  
313 environmental covariates significantly explained the GxE # (Supplemental Figure 4).  
314 Considering only the most significant covariate, from 18% (FW) to 47% (fset) of the GxE  
315 (proportion of the sum of squares) could be reliably attributed to the responses of  
316 genotypes to climatic parameters measured within the greenhouses. To perform the  
317 factorial regression model (4), the most important environmental covariate was first  
318 identified for each trait (Supplemental Figure 4). Growth traits, height and leaf were for  
319 example mostly affected by the thermal amplitude and maximal temperature, respectively,  
320 while yield component traits, FW and nfr were particularly sensitive to the sum of degree  
321 day. The vapour pressure deficit (Vpd, kPa) was the most important environmental factor  
322 affecting firm, fset and SSC. Flowering time (flw) and nflw were mostly affected by minimal  
323 temperatures and relative humidity, respectively. Stem diameter was the only trait for which  
324 none of the environmental covariates significantly affected the trait.

## 325 **Phenotypic plasticity**

326 Three different parameters were used to quantify phenotypic plasticity in the MAGIC-MET  
327 design. For each trait, the slope and VAR from the Finlay-Wilkinson regression model and the  
328 genotypic sensitivity to the most important environmental covariate (SCv) from the factorial  
329 regression model were extracted. A large genetic variability was observed for plasticity of all  
330 traits (Supplemental Figure 5 and Supplemental Figure 6). Besides, significant correlations  
331 were found between the mean phenotypes and plasticity parameters (Figure 2) for most of  
332 the traits. The best average-performing genotypes were usually the most responsive to  
333 environmental variation as highlighted by the positive correlation between the genotypic  
334 means and slope from the Finlay-Wilkinson regression model. The majority of the MAGIC  
335 lines responded in the same direction to the environmental quality and only a few genotypes  
336 (none in the case of height) showed negative reaction norms; however, more divergent  
337 shapes of reaction norms were observed from the factorial regression model (Supplemental  
338 Figure 5).

## 339 **QTL mapping**

340 We used genotypic means and plasticity measurements for every trait as input phenotypes  
341 to decipher the genetic architecture of tomato response to abiotic stresses. Considering the  
342 10 traits evaluated, a total of 104 unique QTLs were identified for genotypic means and the  
343 plasticity parameters (Supplemental Table 4). The proportion of QTLs shared between mean  
344 and plasticity was about 21%, lower than QTLs that were plasticity or mean specific (79%).  
345 Considering only the 63 plasticity QTLs, 11 and 7 QTLs were specifically detected with the  
346 SCv and VAR plasticity parameters. Plasticity QTLs were detected on every chromosome  
347 (Figure 3); however, the chromosome 1 showed the highest number with 12 plasticity QTLs.  
348 In this chromosome, plasticity QTLs were detected at least once for every trait. The  
349 chromosome 11 carried a total of 11 plasticity QTLs and interestingly all these QTL (except  
350 ppnflw11.1) co-localized in a short region of the chromosome between 52 and 55 Mbp. The  
351 chromosomes 5, 6 and 10 showed the lowest number (only 3) of plasticity QTLs. For QTLs  
352 detected on genotypic means, the number of QTLs per chromosome varied from 2 QTLs on  
353 chromosomes 6 and 10 to one QTL on chromosome 1.

## 354 **QTL-by-environment analysis (QEI)**

355 Multi-environment forward-backward models were used to assess the significance and the  
356 strength of the QTL effects across environments. The QEI analysis was conducted in two  
357 steps using the same set of 1345 SNP markers that were also used for linkage mapping  
358 analysis. This analysis yielded 28 QEI (only those showing significant interaction) for the 10  
359 traits (Supplemental Table 4). The number of QEI varied from 0 QEI for *nfr* to 6 QEI for *flw*.  
360 These two traits also demonstrated the lowest and highest  $H^2$ .

361 All QEI identified in this step were confronted to the plasticity and genotypic means QTLs  
362 using the physical positions of the QTLs and their confidence intervals. Interestingly, this  
363 comparison revealed that all the detected QEI were also identified using either genotypic  
364 means or plasticity parameters, in the linkage mapping analysis, except two QEI located on  
365 the same region of chromosome 6 (*flw6.1* and *firm6.1*). Among the 106 unique QTLs  
366 identified on genotypic means, PP and QEI, a notable number of QTLs were specific  
367 representing 30 and 32% for plasticity and genotypic means, respectively (Figure 4). Eight  
368 QTLs involving five different traits (*flw1.1*, *fw2.1*, *fw2.2*, *fw11.2*, *leaf6.1*, *nflw11.2*, *SSC1.2* and  
369 *SSC9.1*) were identified with all the three approaches highlighting their robustness and  
370 susceptibility to environmental variation.

### 371 **Genetic location of the MAGIC-MET QTLs**

372 The physical positions based on the SL2.50 version of the reference genome, were used to  
373 compare the position of the different QTL category (genotypic means, plasticity or QEI).  
374 Indeed, a recent study has identified different tomato regions (Sweep regions) that were  
375 selected during domestication and improvement events (Zhu et al., 2018). These regions  
376 were cross checked against the positions of our QTLs. Some QTLs detected in the MAGIC-  
377 MET design were located in large regions thus colocating with a high number of Sweep  
378 regions (Figure 5 & Supplemental Figure 7). Thus, considering only the QTLs with CI lower  
379 than 2Mbp intervals and all QEI, a total of 61 QTLs were selected and compared with the  
380 Sweep regions. Plasticity QTLs appeared to be in majority located within the Sweep regions  
381 and only 6% of the selected plasticity QTLs were outside the domestication/improvement  
382 selective sweeps (Supplemental Figure 8). Interestingly, the Sweep region SW75 located in  
383 chromosome 3 (between 64.76 and 65.01 Mbp) carried a total of five QTLs (*ht3.1*, *fset3.1*,  
384 *flw3.2*, *leaf3.1*, *fset3.1*). The Supplemental Table 5 presents all the Sweep regions holding at

385 least one MAGIC-MET QTL. Chromosome 11 was highlighted as holding a number of  
386 plasticity QTLs for different traits (Figure 3). Indeed, seven different QTLs all identified with  
387 plasticity parameters, were located within the Sweep regions SW254 and SW255, from 53.81  
388 – 55.62 Mbp on chromosome 11 (Supplemental Figure 9). Among the ten QTLs that were  
389 outside the Sweep regions, one QTL was identified for mean FW and located on  
390 chromosome 5 (fw5.1) in position 4.52 Mbp. This QTL was mapped in a region holding other  
391 QTLs segregating in the MAGIC population for fruit size, fruit width and fruit length  
392 (Supplemental Table 6; data from the experiment in Pascual et al. (2015)).

### 393 **Candidate genes**

394 Confidence intervals (CI) of the MAGIC-MET QTLs varied from 0.45Mbp to 87Mbp including a  
395 variable number of genes. We thus focused on QTLs presenting CI regions smaller than  
396 2Mbp for CG screening. From 49 (nflw12.1) to 256 (diam4.1) genes were within the regions  
397 of the selected QTLs. Taking advantage of the parental allelic effect, the CG were narrowed  
398 for each QTL by contrasting the allelic effect of the eight parental lines. The selected  
399 candidates after the filtering procedure are presented in Supplemental Table 7, highlighting  
400 interesting candidates for further studies. Flowering time QTLs for instance included some  
401 CG with consistent matching regarding their functional annotation. For example, the CI of  
402 the QTL ppflw11.1 on chromosome 11 included two CG: Solyc11g070100 and  
403 Solyc11g071250 corresponding to “Early flowering protein” (ELF) and “EMBYO FLOWERING  
404 1-like protein” (EMF1), respectively. Among other potential flowering candidates, we noticed  
405 Solyc12g010490 (AP2-like ERF) for the QTL flw12.1 and Solyc03g114890 and Solyc03g114900  
406 (COBRA-like proteins) for the QTL flw3.2. Aside flowering time, the selected candidate genes  
407 for the QTLs diam4.1 and ppSSC1.1 included the Solyc04g081870 (annotated as an Expansin  
408 gene) and Solyc01g006740 (annotated as Sucrose phosphate phosphatase) genes,  
409 respectively.

410 We could identify some plasticity QTLs showing sensitivity to the environmental conditions,  
411 notably the QTLs detected using the Scv plasticity parameter. Candidate genes were  
412 screened for some QTLs falling into this category. The ppfw9.1 QTL CI for example, showing  
413 susceptibility to the sum of degree day (SDD), carried a chaperone candidate  
414 (solyc09g091180) which might be involved in regulating fruit weight depending on the SDD

415 variation. Similarly, the QTL ppleaf11.1 is affected by the maximal temperature  
416 (Supplemental Table 4). Three CG (Solyc11g071830, Solyc11g071930 and Solyc11g071710)  
417 belonging to the Chaperone J-domain family, were retained after the filtering procedure in  
418 the region of this QTL. Interestingly, the DnaJ-like zinc-finger gene (Solyc11g071710) was  
419 among the candidates corresponding to several plasticity QTL including ppflw11.1,  
420 ppleaf11.1, ppnflw11.1, ppht11.1 and ppdiam11.2. This gene presented a total of 122  
421 polymorphisms across the eight parental lines among which 35 and 68 are in the up-stream  
422 and down-stream gene region. Further investigation regarding this gene is needed to state  
423 its potential pleiotropic effect.

424

## 425 **DISCUSSION**

### 426 **Genetic variability in tomato response to environmental variation**

427 Genotype x environment interaction is a long-standing challenge for breeders and the  
428 predicted climate change has encouraged plant geneticists to devote more attention into  
429 understanding its genetic basis. Tomato is a widely cultivated crop adapted to a variety of  
430 environmental conditions (Rothan et al. 2019). However, important incidences of abiotic  
431 stress in the final productivity, fruit quality and reproductive performance have been noticed  
432 (Albert et al. 2016; Estañ et al. 2009; Mitchell et al. 1991; Xu et al. 2017). We quantified the  
433 level of GxE and the subjacent phenotypic plasticity in a multi-environment and multi-stress  
434 trial – involving induced water-deficit, salinity and heat stresses – in a highly recombinant  
435 tomato population. An important genetic variability was observed for the plasticity traits  
436 related to yield, fruit quality, plant growth and phenology (Supplemental Figure 6). This  
437 highlights the interest of the MAGIC population as a valuable resource for tomato breeding  
438 in dynamic changing environments. Tomato wild species have been also characterized as an  
439 important reservoir for abiotic stress tolerance genes (Foolad, 2007). However, their  
440 effective use in breeding programs could be difficult due to undesirable linkage drag, notably  
441 for fruit quality. Unlikely, the MAGIC population characterized here is an intra-specific  
442 population with high diversity regarding fruit quality components, which provides a great  
443 advantage as a breeding resource compared to wild populations.

444 Several statistical models are available to explore, describe and predict GxE in plants (Yan et



445 al., 2007; Malosetti et al., 2013). Factorial regression model is among the most attractive as  
446 it allows to describe the observed GxE regarding relevant environmental information. We  
447 used the factorial regression model with different environmental covariates that are readily  
448 accessible from year to year, which allowed us to predict a variable proportion of the  
449 observed GxE (Supplemental Figure 4). Besides, each MAGIC line was characterized for its  
450 sensitivity to the growing climatic conditions opening avenues to effectively select the most  
451 interesting genotypes for further evaluation in breeding programs targeting stressful  
452 environments.

453 Interestingly we found significant correlation between the genotypic sensitivities to the  
454 different environmental covariates and slopes from the Finlay-Wilkinson regression model  
455 (Supplemental Figure 10). This emphasizes the adequacy of the selected environmental  
456 covariates to explain differences observed in the average performance of the genotypes  
457 across environments. Conversely, slope and VAR showed less significant correlations,  
458 although they were both correlated to mean phenotypes in the same direction – except for  
459 SSC (Figure 2). This may be induced by distinct genetic regulation of these two plasticity  
460 parameters which reflect different types of agronomic stability (Lin et al. 1986). Indeed, we  
461 identified 7 and 14 plasticity QTLs that were specific to VAR and slope, respectively  
462 (Supplemental Table 4). The correlation pattern of the different plasticity parameters evokes  
463 a complex regulation of plasticity which besides is seemingly trait specific.

464 Significant correlation at phenotypic level might result from the action of pleiotropic genes.  
465 The Figure 2 displays the correlations between genotypic means and plasticity which were  
466 significant for almost every trait at variable degree. These correlations were reflected at the  
467 genetic level by 22 QTLs overlapping between genotypic mean and plasticity parameters,  
468 representing about 21% of all identified QTLs. However, a high proportion of the QTLs were  
469 specific either to genotypic means or plasticity parameters (Supplemental Figure 11), hence  
470 suggesting the action of both common and distinct genetic loci in the control of mean  
471 phenotype and plasticity variation in tomato.

#### 472 **Genomic location of the MAGIC-MET QTLs**

473 The availability of substantial genomic information in tomato enabled the identification of  
474 different genomic regions which have undergone selective sweeps which were strongly

475 selected during the domestication and improvement process (Lin et al. 2014; Zhu et al.  
476 2018). When projected on the physical positions of the tomato reference genome (SL2.50  
477 version), most of the plasticity QTLs we identified were located within the sweep regions  
478 defined by Zhu et al. (2018). It therefore suggests that plasticity might have been selected  
479 together with other interesting agronomic traits during tomato domestication and  
480 improvement. For instance, this is corroborated by the positive correlation between slope  
481 (from the Finlay-Wilkinson regression model) and mean fruit weight variation. Indeed,  
482 genotypes with higher FW slope are characterized by good adaptability in high quality  
483 environments and will likely be intended to selection. Co-selection of allelic variants leading  
484 to higher performance in optimal condition together with plasticity alleles is a realistic  
485 assumption that would explain the significant correlation that we observed between the  
486 genotypic means and plasticity. In rice for instance, *Ghd7* has been described as a key high-  
487 yield gene simultaneously involved in the regulation of plasticity of panicle and tiller  
488 branching and involved in abiotic stress response (Herath 2019). This example highlights a  
489 gene carrying different allelic variants affecting together plasticity and mean phenotypes.  
490 Further investigations are needed to assess how domestication and breeding have affected  
491 plasticity in tomato and other crop species.

492 An important genomic region involved in the genetic regulation of plasticity for six different  
493 traits was identified in chromosome 11 (Supplemental Figure 9). This region is obviously a  
494 regulatory hub carrying interesting plasticity genes. It remains to determine if the co-  
495 localization of the different plasticity QTLs in this region is due to the action of a pleiotropic  
496 gene or different linked genes. Nevertheless, the chromosome 11 region highlighted here is  
497 an interesting target for breeding as well as for understanding the functional mechanisms of  
498 plasticity genes.

#### 499 **Allelic-sensitivity vs gene-regulatory model**

500 Sixty-three plasticity QTLs were identified among which 22 (35%) were also identified when  
501 using the genotypic means; and 41 (65%) were specific to plasticity. Via et al. (1995)  
502 proposed two genetic models – the allelic-sensitivity and gene-regulatory models – among  
503 the mechanisms involved in the genetic control of phenotypic plasticity. These two models  
504 are distinguishable through QTL analysis (Ungerer et al., 2003) with the expectation that

505 allelic-sensitivity model will lead to co-localization of genotypic means and plasticity QTLs,  
506 while a distinct location of QTLs affecting mean and plasticity will likely correspond to the  
507 gene-regulatory model (Kusmec et al., 2017). Regarding our results, both models are  
508 suspected to regulate tomato plasticity, even though the gene-regulatory model is  
509 predominant with 65% of the plasticity QTLs that did not co-localize with genotypic means  
510 QTLs for the same trait. In maize, using a larger number of environments and traits, Kusmec  
511 et al. (2017) found similar results and even a higher rate of distinct locations of plasticity and  
512 mean QTLs. Studying plasticity as a trait *per se* is therefore of a major interest since breeding  
513 in both direction (considering the mean phenotype and its plasticity) is achievable. Through  
514 transcriptomic analyses, Albert et al. (2018) observed that genotype x water deficit  
515 interaction was mostly associated to *trans*-acting genes which could be assimilated to the  
516 gene-regulatory model in agreement with our results.

517 Although the distinct location of QTLs detected on plasticity and genotypic means could be  
518 confidently assigned to the action of genes in interaction, their co-localization is not  
519 necessarily a case of allelic-sensitivity regulation, especially if the QTL is in a large region.  
520 Indeed, the allelic-sensitivity model assumes that a constitutive gene is directly sensitive to  
521 the environment regulating its expression across different environmental conditions,  
522 inducing hence phenotypic plasticity. This is a very strong hypothesis regarding the QTLs  
523 since the overlapping region between genotypic means and plasticity could carry different  
524 causal variants in strong linkage disequilibrium affecting either mean phenotype or plasticity.  
525 Thus, co-locating mean and plasticity QTLs should be not automatically imputed to the  
526 allelic-sensitivity model. We found a total of 22 constitutive QTLs between genotypic means  
527 and plasticity for all 10 measured traits (Supplemental Table 4). Considering the estimated  
528 QTL effects, the variation patterns of the eight parental allelic classes were compared  
529 between mean and PP QTL of the same trait. Only ten QTL showed consistent allelic effects  
530 (Spearman correlation significant at 0.05 threshold level) strengthening the hypothesis of  
531 the allelic-sensitivity model for these QTLs (Figure 6). Further studies should help to  
532 elucidate and validate the candidate plasticity genes and to clarify their functional  
533 mechanism.

#### 534 **Complementary methods to identify environment-responsive QTLs**

535 Different approaches have been proposed in the literature to dissect GxE into its genetic

536 components (Malosetti et al., 2013; El-Soda et al., 2014). We used a mixed linear model with  
537 a random genetic effect accounting for the correlation structure of the MAGIC-MET design  
538 to identify the QEI. Extending the use of mixed linear models to MAGIC populations in the  
539 framework of MET analysis has been very rarely applied in crops. To our knowledge, only  
540 Verbyla et al., (2014) applied such approach in wheat and identified QEI for flowering time.  
541 Our model was adequate to account for the complex mating design of the MAGIC population  
542 by using the haplotype probabilities. Indeed, it allows estimating the QTL effect for each  
543 parental allelic class and for each environment at every SNP marker. Overall, 28 QEI were  
544 detected showing significant marker x environment interaction for ten traits.

545 Methods using plasticity as a trait *per se* are also attractive to identify environmentally  
546 sensitive QTLs. This strategy was applied in maize, sunflower, barley and soybean to detect  
547 the loci governing GxE (Lacaze et al., 2009; Gage et al., 2017; Kusmec et al., 2017; Mangin et  
548 al., 2017; Xavier et al., 2018). With different plasticity parameters, we identified a total of 63  
549 plasticity QTLs and only 24% were also identified with the QEI models. Thus, both methods,  
550 using plasticity or mixed linear models, are complementary approaches to study the genetic  
551 component of GxE.

## 552 **Candidate genes**

553 Multi-parental populations are powerful for QTL mapping studies (Huang et al. 2012; Kover  
554 et al. 2009) and are besides interesting for fine mapping and candidate gene screening.  
555 Barrero et al. (2015) for instance considered the variation of the QTL effect estimated for the  
556 different parental lines, combined with transcriptomic analyses to efficiently identify  
557 candidate genes. Similarly, Septiani et al. (2019) narrowed candidate genes for Fusarium  
558 resistance in a maize MAGIC population using allelic effect of the MAGIC parents.

559 A number of candidate genes were proposed in our study, affecting both genotypic means  
560 and plasticity variation. These candidate genes were selected based on the parental allelic  
561 effect and represent valuable targets for future studies attempting to characterize the  
562 molecular mechanisms underlying plasticity in tomato. Indeed, relevant candidate genes  
563 were proposed for plasticity of flowering time including the Solyc11g071250 which  
564 corresponds to an “EMBYO FLOWERING 1-like protein” (EMF1). The implication of EMF1 in  
565 flowering time has been observed in Arabidopsis by Aubert et al., (2001) who highlighted an

566 indirect effect of EMF1 on flowering time and inflorescence. More recently, Luo et al., (2018)  
567 outlined the role of EMF1 interacting with CONSTANS proteins in a complex pathway to  
568 regulate the expression of flowering time genes in Arabidopsis. Solyc11g070100 which is  
569 annotated as “Early flowering protein” (ELF) gene is also an interesting candidate for  
570 flowering time regulation. It was observed across species that a consistent expression of  
571 ELF3 can extend the rapid transition to flowering (Huang et al., 2017). ELF3 loss of function is  
572 therefore expected to trigger early flowering according to these authors. Interestingly,  
573 Solyc11g070100 was affected by 69 SNPs and 14 INDELS polymorphisms, among which only  
574 one SNP showed polymorphism variation in line with the estimated allelic effect for the eight  
575 parental lines at this QTL. This SNP was localized at the position 54,632,225 bp in  
576 chromosome 11, upstream the gene Solyc11g070100. The parent LA1420 carried the  
577 reference allele at this SNP while the remaining parents held the alternative allele.  
578 Considering the estimated allelic effects at this QTL, we could assume that the LA1420 allele  
579 variant might induce an early flowering phenotype comparatively to the other parents.

## 580 **Conclusion**

581 We aimed to dissect the genetic architecture of tomato response to different environments  
582 involving control and stress growing conditions. The MAGIC population demonstrated a large  
583 genetic variability in response to abiotic stresses which was reflected by the identification of  
584 63 plasticity QTLs. This was achieved through the use of different plasticity parameter  
585 highlighting the importance of plasticity quantification for deciphering its genetic basis. The  
586 plasticity QTLs were in majority (65% of the plasticity QTLs) located in distinct regions than  
587 the QTLs detected for the mean phenotypes, suggesting a specific genetic control of mean  
588 trait variation and plasticity at some extent. Using plasticity as a trait *per se* in mapping  
589 analysis turned out to be a good method for identifying genetic regions underlying GxE.  
590 Almost all the QEI were also identified for at least one of the plasticity parameters. Overall,  
591 this study presents the MAGIC population as a powerful resource for tomato breeding under  
592 abiotic stress conditions, as well as for understanding the genetic mechanisms regulating  
593 tomato response to environmental variation.

594

## 595 **Acknowledgements:**

596 We acknowledge the greenhouse staff of INRA GAFL, Gautier SEMENCES and Hazera seeds  
597 for the trial management. The ANR project Adaptom (ANR-13-ADAP-0013) and TomEpiSet  
598 (ANR-16-CE20-0014) supported this work. ID was supported by the WAAPP (West Africa  
599 Agricultural Productivity Project) fellowship and hosted as Ph.D. student in the INRA GAFL.

600

601

602

## 603 **References**

- 604 Albert, E., Duboscq, R., Latreille, M., Santoni, S., Beukers, M., Bouchet, J.-P., et al. (2018)  
605 Allele specific expression and genetic determinants of transcriptomic variations in  
606 response to mild water deficit in tomato. *Plant J.*
- 607 Albert, E., Segura, V., Gricourt, J., Bonnefoi, J., Derivot, L., and Causse, M. (2016) Association  
608 mapping reveals the genetic architecture of tomato response to water deficit: focus on  
609 major fruit quality traits. *J Exp Bot.* 67: 6413–6430.
- 610 Aubert, D., Chen, L., Moon, Y.H., Martin, D., Castle, L.A., Yang, C.H., et al. (2001) EMF1, a  
611 novel protein involved in the control of shoot architecture and flowering in Arabidopsis.  
612 *Plant Cell.* 13: 1865–75.
- 613 Barrero, J.M., Cavanagh, C., Verbyla, K.L., Tibbits, J.F.G., Verbyla, A.P., Huang, B.E., et al.  
614 (2015) Transcriptomic analysis of wheat near-isogenic lines identifies PM19-A1 and A2  
615 as candidates for a major dormancy QTL. *Genome Biol.* 16: 93.
- 616 Bradshaw, A.D. (1965) Evolutionary Significance of Phenotypic Plasticity in Plants. *Adv Genet.*  
617 13: 115–155.
- 618 Broman, K.W., Gatti, D.M., Simecek, P., Furlotte, N.A., Prins, P., Sen, S., et al. (2019) R/qt12:  
619 Software for Mapping Quantitative Trait Loci with High-Dimensional Data and  
620 Multiparent Populations. *Genetics.* 211: 495–502.
- 621 Causse, M., Desplat, N., Pascual, L., Le Paslier, M.-C., Sauvage, C., Bauchet, G., et al. (2013)  
622 Whole genome resequencing in tomato reveals variation associated with introgression  
623 and breeding events. *BMC Genomics.* 14: 791.
- 624 Costa, J.M., Ortuño, M.F., and Chaves, M.M. (2007) Deficit Irrigation as a Strategy to Save  
625 Water: Physiology and Potential Application to Horticulture. *J Integr Plant Biol.* 49:  
626 1421–1434.
- 627 Diouf, I.A., Derivot, L., Bitton, F., Pascual, L., and Causse, M. (2018) Water Deficit and Salinity  
628 Stress Reveal Many Specific QTL for Plant Growth and Fruit Quality Traits in Tomato.  
629 *Front Plant Sci.* 9: 279.
- 630 Driedonks, N., Wolters-Arts, M., Huber, H., de Boer, G.-J., Vriezen, W., Mariani, C., et al.  
631 (2018) Exploring the natural variation for reproductive thermotolerance in wild tomato  
632 species. *Euphytica.* 214: 67.
- 633 El-Soda, M., Malosetti, M., Zwaan, B.J., Koornneef, M., and Aarts, M.G.M. (2014) . Trends  
634 Plant Sci.
- 635 Estañ, M.T., Villalta, I., Bolarín, M.C., Carbonell, E.A., and Asins, M.J. (2009) Identification of  
636 fruit yield loci controlling the salt tolerance conferred by solanum rootstocks. *Theor*  
637 *Appl Genet.* 118: 305–312.
- 638 Finlay, B.K.W., and Wilkinson, G.N. (1963) THE ANALYSIS OF ADAPTATION IN A PLANT-  
639 BREEDING PROGRAMME The ability of some crop varieties to perform well over a wide  
640 range of environ - mental conditions has lng been appreciated by the agronomist and  
641 plant breeder . In the cereal belts of southern Au. .
- 642 Foolad, M.R. (2007) Genome mapping and molecular breeding of tomato. *Int J Plant*  
643 *Genomics.* 2007: 64358.
- 644 Gage, J.L., Jarquin, D., Romay, C., Lorenz, A., Buckler, E.S., Kaeppeler, S., et al. (2017) The

- 645 effect of artificial selection on phenotypic plasticity in maize. *Nat Commun.* 8: 1348.
- 646 Gillespie, J.H., and Turelli, M. (1989) Genotype-environment interactions and the  
647 maintenance of polygenic variation. *Genetics.* 121.
- 648 Giraud, H., Bauland, C., Falque, M., Madur, D., Combes, V., Jamin, P., et al. (2017) Reciprocal  
649 Genetics: Identifying QTL for General and Specific Combining Abilities in Hybrids  
650 Between Multiparental Populations from Two Maize (*Zea mays* L.) Heterotic Groups.  
651 *Genetics.* 207: 1167–1180.
- 652 Grandillo, S., Termolino, P., and van der Knaap, E. (2013) Molecular Mapping of Complex  
653 Traits in Tomato. In *Genetics, Genomics, and Breeding of Tomato*. pp. 150–227 Science  
654 Publishers.
- 655 Grilli, G., Trevizan Braz, L., Gertrudes, E., and Lemos, M. (2007) QTL identification for  
656 tolerance to fruit set in tomato by AFLP markers. *Crop Breed Appl Biotechnol.* 7: 234–  
657 241.
- 658 Herath, V. (2019) The architecture of the GhD7 promoter reveals the roles of GhD7 in  
659 growth, development and the abiotic stress response in rice. *Comput Biol Chem.* 82: 1–  
660 8.
- 661 Huang, B.E., and George, A.W. (2011) R/mpMap: A computational platform for the genetic  
662 analysis of multiparent recombinant inbred lines. *Bioinformatics.* 27: 727–729.
- 663 Huang, B.E., George, A.W., Forrest, K.L., Kilian, A., Hayden, M.J., Morell, M.K., et al. (2012) A  
664 multiparent advanced generation inter-cross population for genetic analysis in wheat.  
665 *Plant Biotechnol J.* 10: 826–839.
- 666 Huang, H., Gehan, M.A., Huss, S.E., Alvarez, S., Lizarraga, C., Gruebbling, E.L., et al. (2017)  
667 Cross-species complementation reveals conserved functions for EARLY FLOWERING 3  
668 between monocots and dicots. *Plant Direct.* 1: e00018.
- 669 Kover, P.X., Valdar, W., Trakalo, J., Scarcelli, N., Ehrenreich, I.M., Purugganan, M.D., et al.  
670 (2009) A multiparent advanced generation inter-cross to fine-map quantitative traits in  
671 *Arabidopsis thaliana*. *PLoS Genet.* 5: e1000551.
- 672 Kusmec, A., Srinivasan, S., Nettleton, D., and Schnable, P.S. (2017) Distinct genetic  
673 architectures for phenotype means and plasticities in *Zea mays*. *Nat Plants.* 3: 715–723.
- 674 Lacaze, X., Hayes, P.M., and Korol, A. (2009) Genetics of phenotypic plasticity: QTL analysis in  
675 barley, *Hordeum vulgare*. *Heredity (Edinb).* 102: 163–173.
- 676 Laitinen, R.A.E., and Nikoloski, Z. (2019) Genetic basis of plasticity in plants. *J Exp Bot.* 70:  
677 739–745.
- 678 Lê, S., Josse, J., and Husson, F. (2008) FactoMineR: An R package for multivariate analysis. *J*  
679 *Stat Softw.* 25: 1–18.
- 680 Lin, C.S., Binns, M.R., and Lefkovitch, L.P. (1986) Stability Analysis: Where Do We Stand? 1.  
681 *Crop Sci.* 26: 894.
- 682 Lin, T., Zhu, G., Zhang, J., Xu, X., Yu, Q., Zheng, Z., et al. (2014) Genomic analyses provide  
683 insights into the history of tomato breeding. *Nat Genet.* 46: 1220–1226.
- 684 Luo, X., Gao, Z., Wang, Y., Chen, Z., Zhang, W., Huang, J., et al. (2018) The NUCLEAR  
685 FACTOR-CONSTANS complex antagonizes Polycomb repression to de-repress  
686 FLOWERING LOCUS T expression in response to inductive long days in *Arabidopsis*.



- 687 *Plant J.* 95: 17–29.
- 688 Malosetti, M., Ribaut, J.-M., and van Eeuwijk, F.A. (2013) The statistical analysis of multi-  
689 environment data: modeling genotype-by-environment interaction and its genetic  
690 basis. *Front Physiol.* 4: 44.
- 691 Mangin, B., Casadebaig, P., Cadic, E., Blanchet, N., Boniface, M.-C., Carrère, S., et al. (2017)  
692 Genetic control of plasticity of oil yield for combined abiotic stresses using a joint  
693 approach of crop modelling and genome-wide association. *Plant Cell Environ.* 40: 2276–  
694 2291.
- 695 Mitchell, J., Shennan, C., and Grattan, S. (1991) Developmental-Changes in Tomato Fruit  
696 Composition in Response To Water Deficit and Salinity. *Physiol Plant.* 83: 177–185.
- 697 Munns, R., and Gilliam, M. (2015) Salinity tolerance of crops - what is the cost? *New Phytol.*  
698 208: 668–673.
- 699 Pascual, L., Desplat, N., Huang, B.E., Desgroux, A., Bruguier, L., Bouchet, J.-P.P., et al. (2015)  
700 Potential of a tomato MAGIC population to decipher the genetic control of quantitative  
701 traits and detect causal variants in the resequencing era. *Plant Biotechnol J.* 13: 565–  
702 577.
- 703 Ripoll, J., Urban, L., Staudt, M., Lopez-Lauri, F., Bidet, L.P.R., and Bertin, N. (2014) Water  
704 shortage and quality of fleshy fruits—making the most of the unavoidable. *J Exp Bot.*  
705 65: 4097–4117.
- 706 Rothan, C., Diouf, I., and Causse, M. (2019) Trait discovery and editing in tomato. *Plant J.* 97:  
707 73–90.
- 708 Scheiner, S.M. (1993) Genetics and Evolution of Phenotypic Plasticity. *Annu Rev Ecol Syst.* 24:  
709 35–68.
- 710 Septiani, P., Lanubile, A., Stagnati, L., Busconi, M., Nelissen, H., Pè, M.E., et al. (2019)  
711 Unravelling the genetic basis of fusarium seedling rot resistance in the MAGIC maize  
712 population: Novel targets for breeding. *Sci Rep.* 9: 4–13.
- 713 Ungerer, M.C., Halldorsdottir, S.S., Purugganan, M.D., and Mackay, T.F.C. (2003) Genotype-  
714 environment interactions at quantitative trait loci affecting inflorescence development  
715 in *Arabidopsis thaliana*. *Genetics.* 165: 353–365.
- 716 Valladares, F., Sanchez-Gomez, D., and Zavala, M.A. (2006) Quantitative estimation of  
717 phenotypic plasticity: bridging the gap between the evolutionary concept and its  
718 ecological applications. *J Ecol.* 94: 1103–1116.
- 719 Verbyla, A.P., Cavanagh, C.R., and Verbyla, K.L. (2014) Whole-Genome Analysis of  
720 Multienvironment or Multitrait QTL in MAGIC. *G3 Genes, Genomes, Genet.* 4.
- 721 Via, S., Gomulkiewicz, R., De Jong, G., Scheiner, S.M., Schlichting, C.D., and Van Tienderen,  
722 P.H. (1995) Adaptive phenotypic plasticity: consensus and controversy. *Trends Ecol Evol.*  
723 10: 212–7.
- 724 Villalta, I., Bernet, G.P., Carbonell, E.A., and Asins, M.J. (2007) Comparative QTL analysis of  
725 salinity tolerance in terms of fruit yield using two solanum populations of F7 lines.  
726 *Theor Appl Genet.* 114: 1001–1017.
- 727 Xavier, A., Jarquin, D., Howard, R., Ramasubramanian, V., Specht, J.E., Graef, G.L., et al.  
728 (2018) Genome-Wide Analysis of Grain Yield Stability and Environmental Interactions in

- 729 a Multiparental Soybean Population. *G3 (Bethesda)*. 8: 519–529.
- 730 Xu, J., Driedonks, N., Rutten, M.J.M., Vriezen, W.H., de Boer, G.-J., and Rieu, I. (2017a)  
731 Mapping quantitative trait loci for heat tolerance of reproductive traits in tomato  
732 (*Solanum lycopersicum*). *Mol Breed.* 37: 58.
- 733 Xu, J., Wolters-Arts, M., Mariani, C., Huber, H., and Rieu, I. (2017b) Heat stress affects  
734 vegetative and reproductive performance and trait correlations in tomato (*Solanum*  
735 *lycopersicum*). *Euphytica*. 213: 156.
- 736 Yan, W., Kang, M.S., Ma, B., Woods, S., and Cornelius, P.L. (2007) GGE Biplot vs. AMMI  
737 Analysis of Genotype-by-Environment Data. *Crop Sci.* 47: 643.
- 738 Zhao, C., Liu, B., Piao, S., Wang, X., Lobell, D.B., Huang, Y., et al. (2017) Temperature increase  
739 reduces global yields of major crops in four independent estimates. *Proc Natl Acad Sci.*  
740 114: 9326–9331.
- 741 Zhu, G., Wang, S., Huang, Z., Zhang, S., Liao, Q., Zhang, C., et al. (2018) Rewiring of the Fruit  
742 Metabolome in Tomato Breeding. *Cell*. 172: 249-261.e12.
- 743

### **Legends of figures (GxE paper)**

**Figure 1:** Clustering environments according to seven environmental covariates, measured during the vegetative and flowering stage.

**Figure 2:** Pearson's correlation between mean and plasticity parameters.

**Figure 3:** Representation of plasticity QTLs along the genome. Numbers above the square represent the different chromosomes and the colors distinguished the different traits. The x-axis represents the physical distances in mega base pair (Mbp).

**Figure 4:** Number of QTLs identified specifically on mean, plasticity or QEI and QTLs that were common to at least two of them.

**Figure 5:** Physical positions of the MAGIC-MET QTLs for fruit weight and flowering time. The following circle with black bars represents the different domestication/ improvement sweep regions identified in (Zhu et al. 2018). The other circles plot the CI of QTLs identified on mean (green), plasticity (orange) or with QEI analysis (purple).

**Figure 6:** Correlation of the estimated allelic effect for consistent QTLs between mean and plasticity phenotypes.

## **Supplemental files**

**Supplemental Figure 1:** Selection of 7 environmental covariates for the factorial regression model. Three periods – each of 20 days – were defined from planting to the end of flowering on the 4<sup>th</sup> truss. The period from 20 to 60 days after planting (DAP) covered vegetative growth and flowering on the 4<sup>th</sup> truss and the measured climatic variables averaged during this period. The different environmental covariates are described

**Supplemental Figure 2:** Boxplot distribution of the traits across environments. The colors of the boxplot are according to the groups defined by clustering of the environments

**Supplemental Figure 3:** Heritability in the MAGIC-MET design. For each trait, heritability was computed at every environment and plotted with heritability of the full design  $H^2$  (in green)

**Supplemental Figure 4:** Proportion of the sum of square attributed to the different factors in the factorial regression model. For each trait, the orange and green stacked bars represent the proportion of the SSq explained by the Genotype and Environment factors in model (4). The remaining colors represent the effect part of the GxE that could be explained by the different environmental covariates. Only significant covariates were highlighted within the bars.

**Supplemental Figure 5:** Reaction norms from the Finlay-Wilkinson regression model (A) and the factorial regression model (B). In figure 5 A, the blue and orange lines represent the positive and negative reaction norms. In Figure 5 B, the green and purple lines represent the positive and negative reaction norms

**Supplemental Figure 6:** Histogram distribution of mean and all plasticity parameters for each trait

**Supplemental Figure 7:** Physical positions of the MAGIC-MET QTLs for diam, leaf, height, fset, nflw, nfr, firm and SSC. The outer circle with gray font represents the known and cloned QTL/gene for each trait. The following circle with black bars represents the different domestication/improvement sweep regions identified in (Zhu et al. 2018). The other circles plot the CI of QTLs identified on mean (green), plasticity (orange) or with QEI analysis (purple)

**Supplemental Figure 8:** Number of the MAGIC-MET QTLs identified within or outside the domesticated/improved regions. Only the MAGIC-MET QTLs within short CI (lower than 2Mbp) were considered. The response specific category included QEI and plasticity specific QTLs; the common category correspond to QTLs that were commonly identified on mean, plasticity and QEI or at least two of them

**Supplemental Figure 9:** Zoom plot on Chromosome 11 region from 53 -57 Mbp. Each color represents a different QTL located in this region and the top black bars are the Sweep regions SW254 and SW255

**Supplemental Figure 10:** Correlation between the genotypic sensitivities to environmental covariates from the factorial regression model and slopes from the Finlay-Wilkinson regression model

**Supplemental Figure 11:** Venn diagram of the number of QTL specific or commonly detected with mean, PP or using the QEI models.

**Supplemental Table 1:** Description of the MAGIC-MET design with the 12 environments and their respective names

**Supplemental Table 2:** Description of the phenotypic traits evaluated in the MAGIC-MET design

**Supplemental Table 3:** Estimates of the variance components from model (2)

**Supplemental Table 4:** Results of QTL and QEI analysis in the MAGIC-MET design

**Supplemental Table 5:** Genetic location of the MAGIC-MET QTLs overlapping with the Sweep (domestication/improvement) regions.

**Supplemental Table 6:** QTLs identified for fruit size, fruit width and fruit length in the MAGIC population

**Supplemental Table 7:** Selected candidate genes for all the mean and plasticity QTLs located within 2Mbp CI region

**Figure 5**

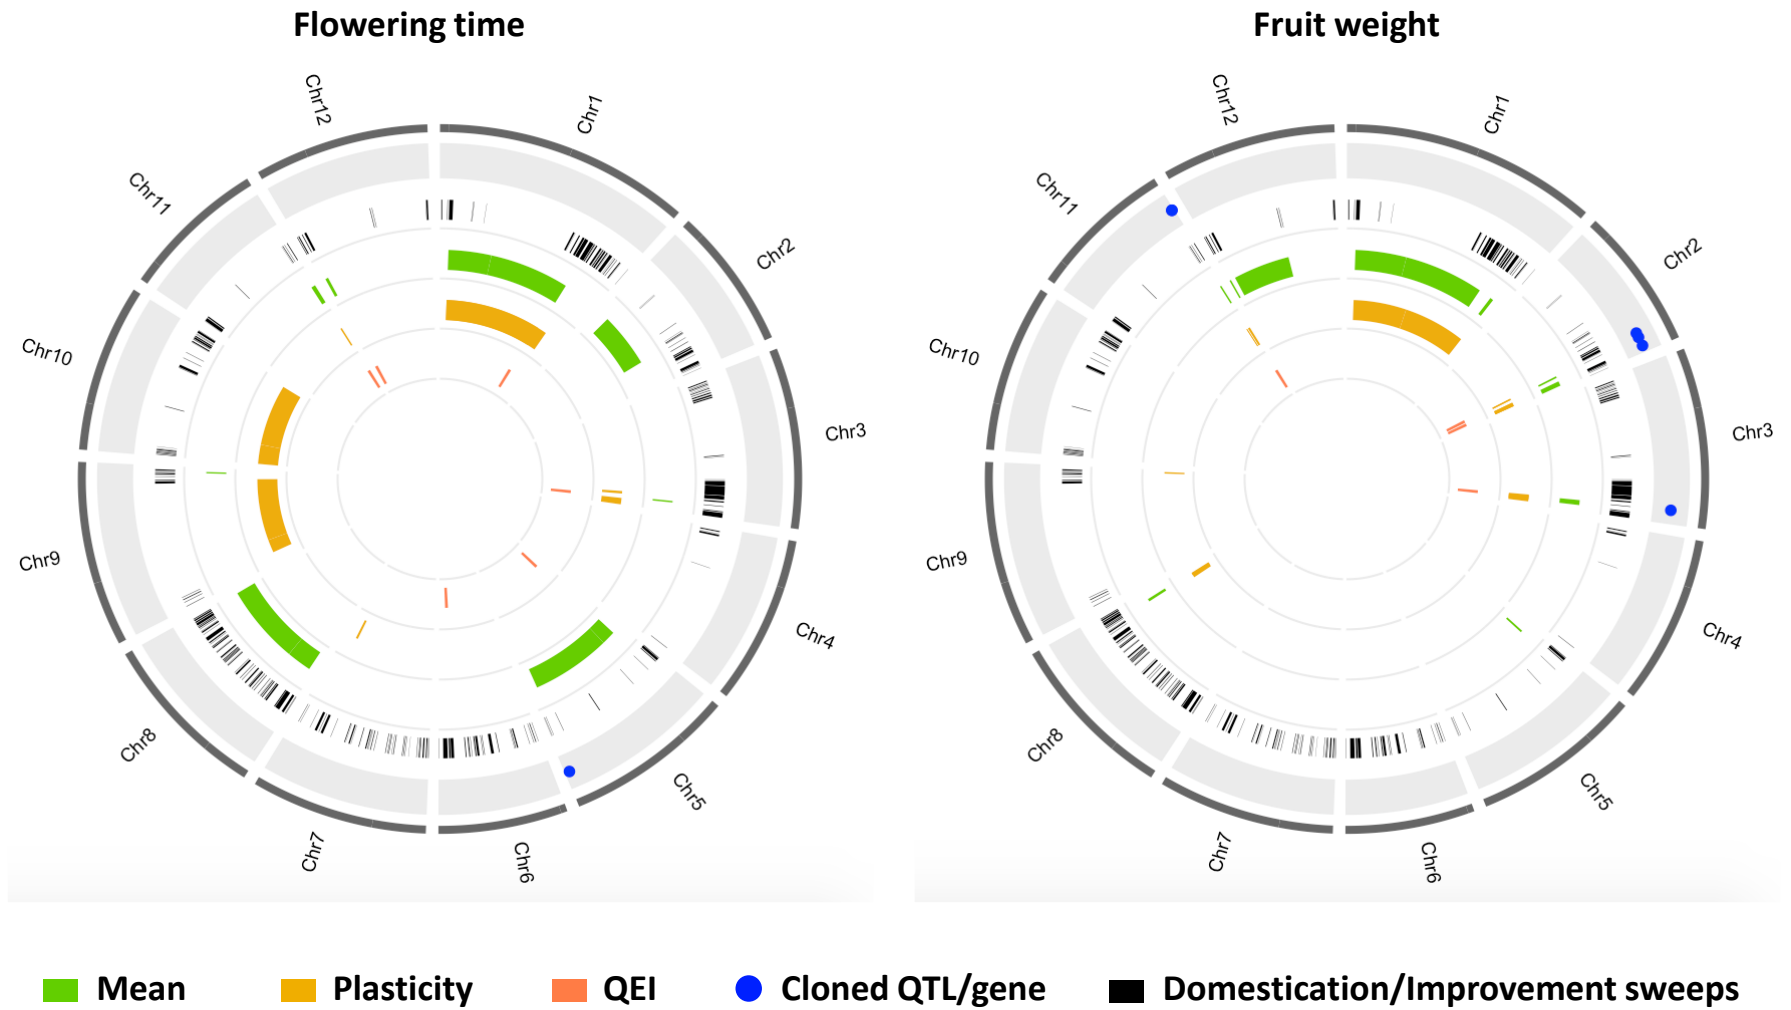

Figure 1

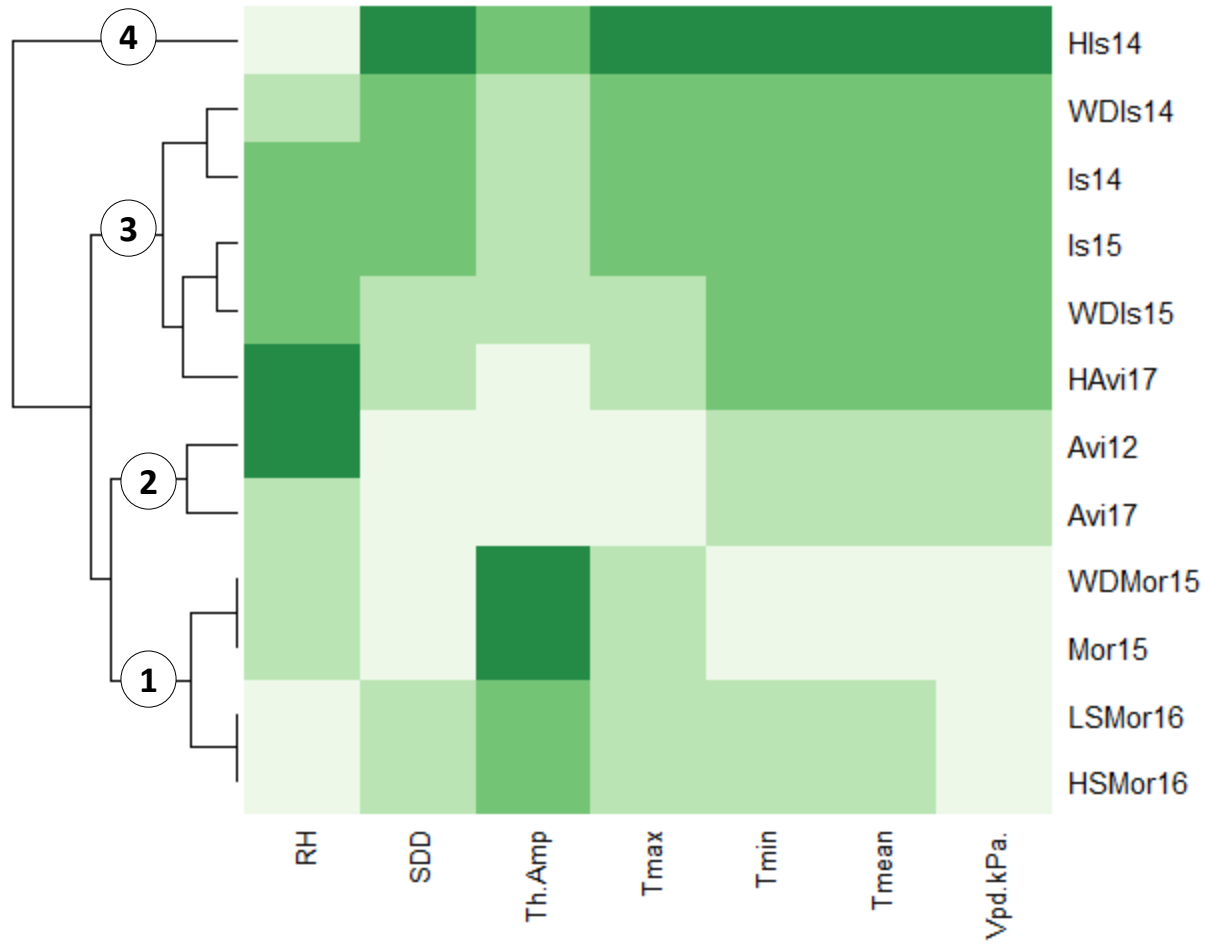

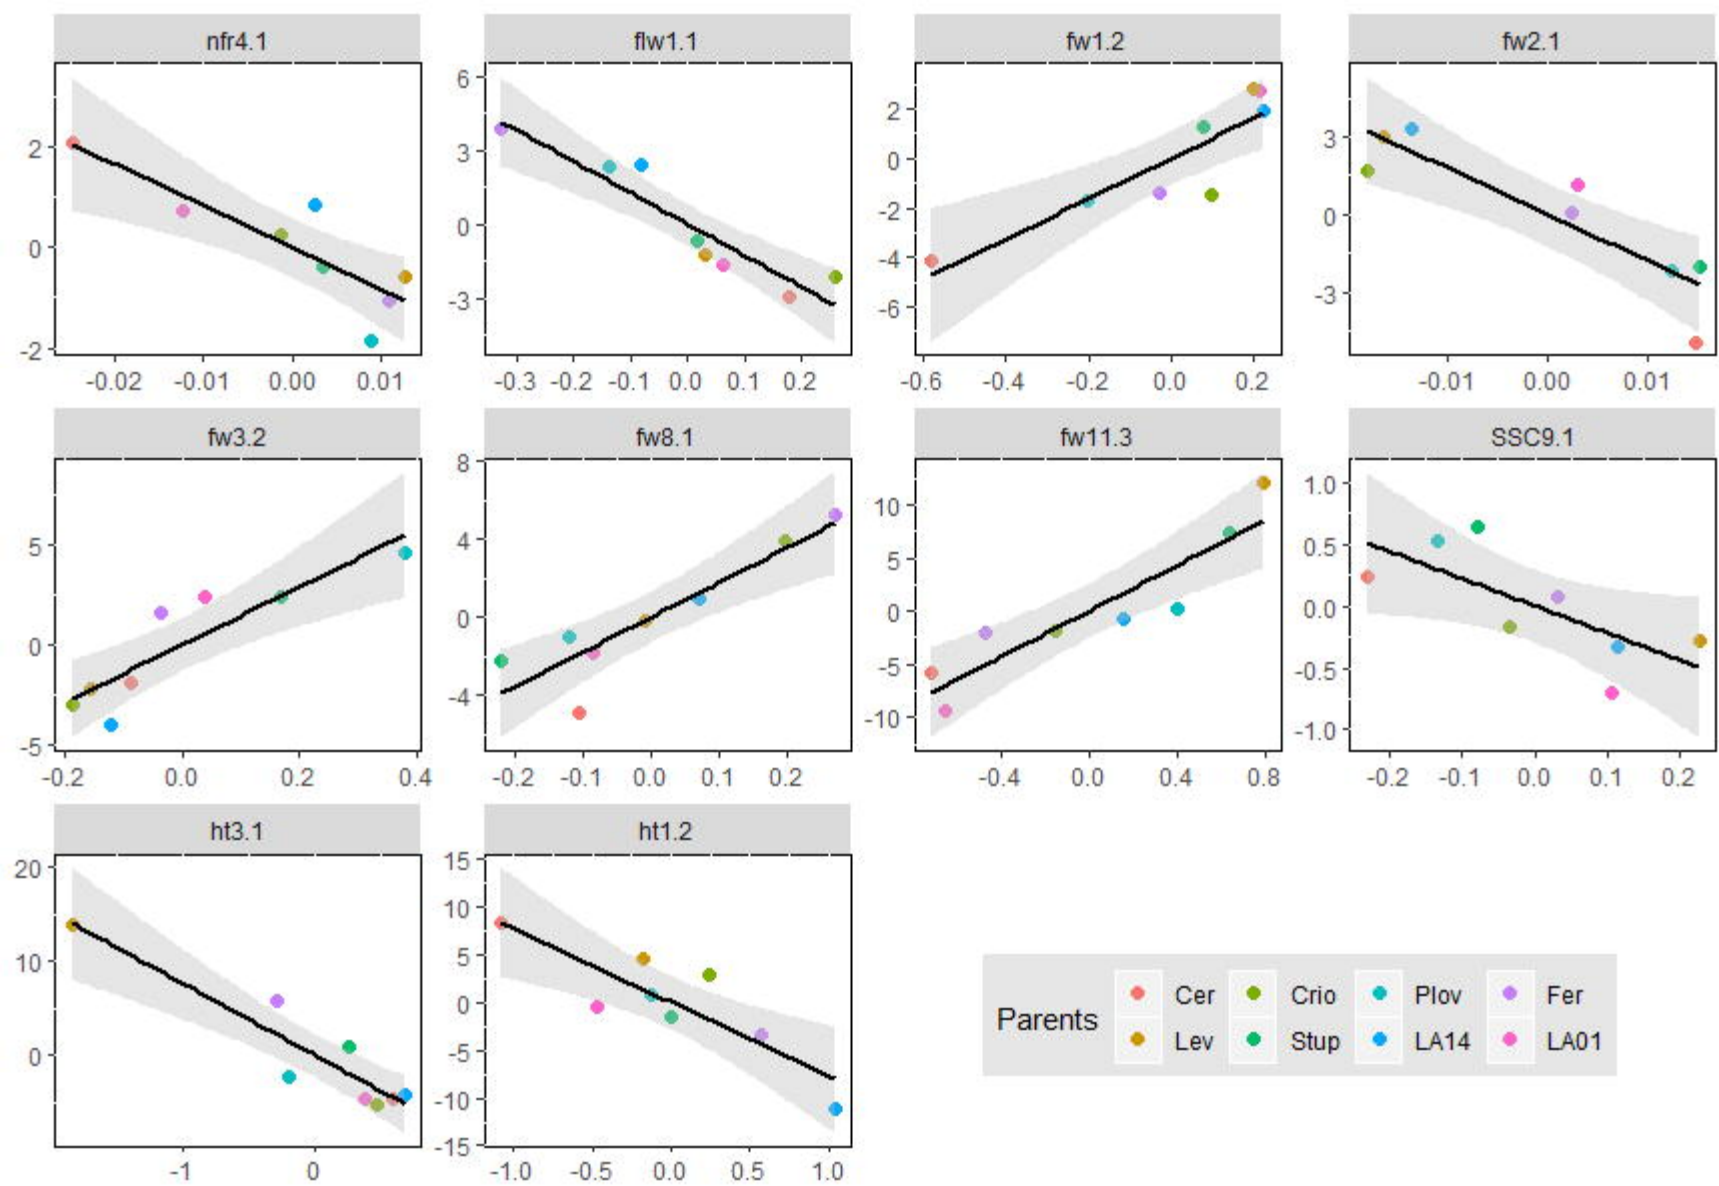



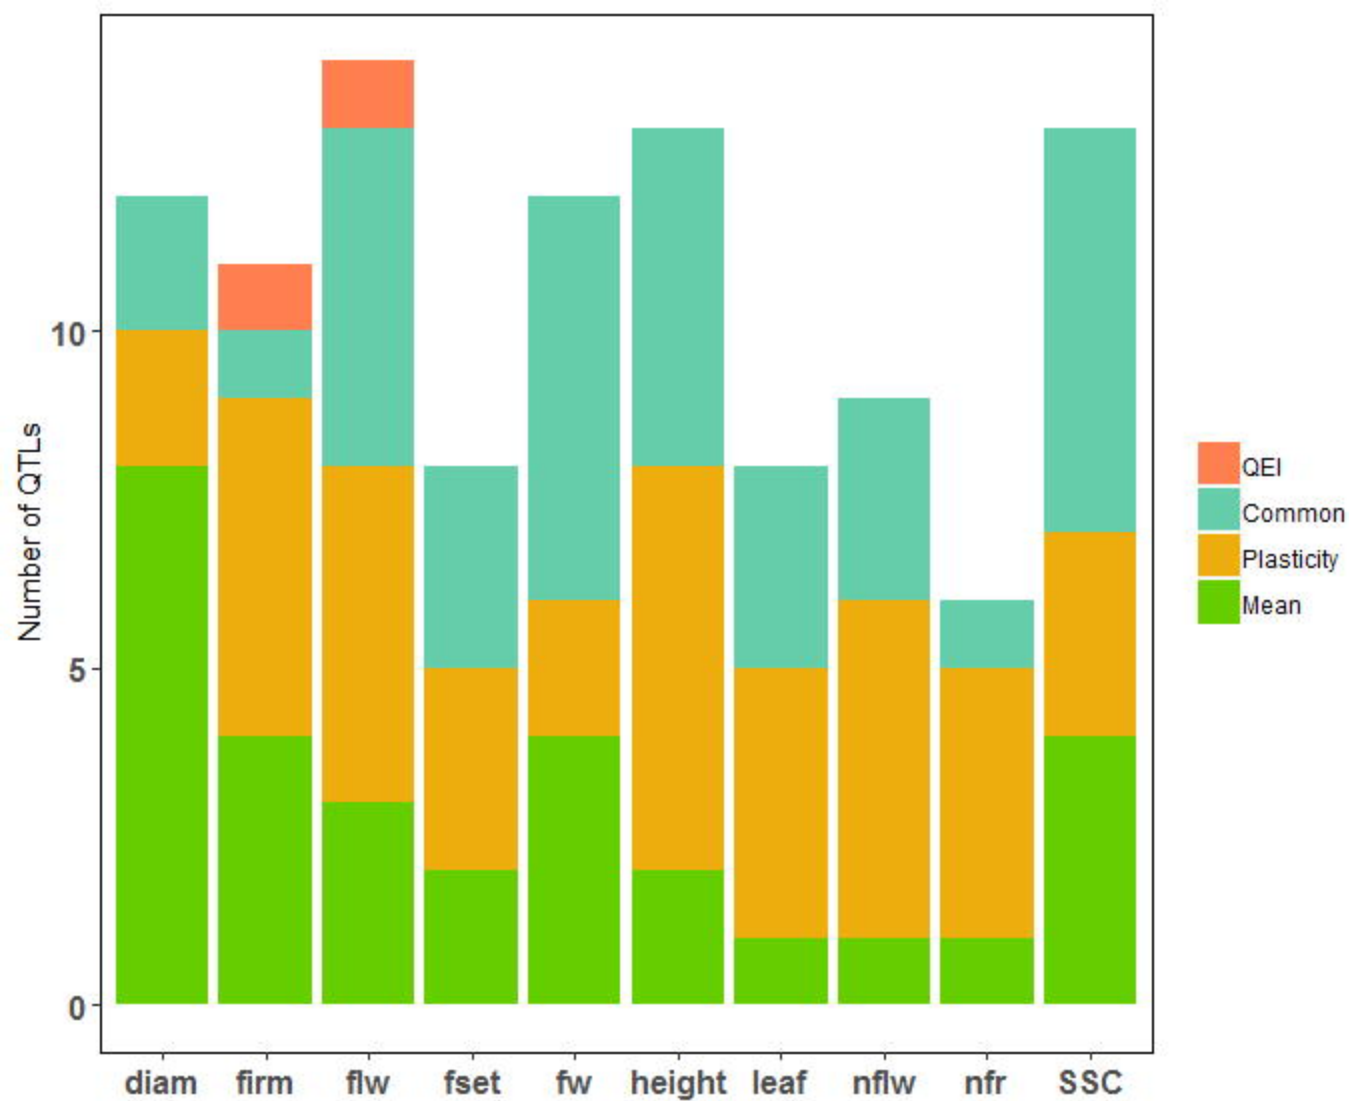

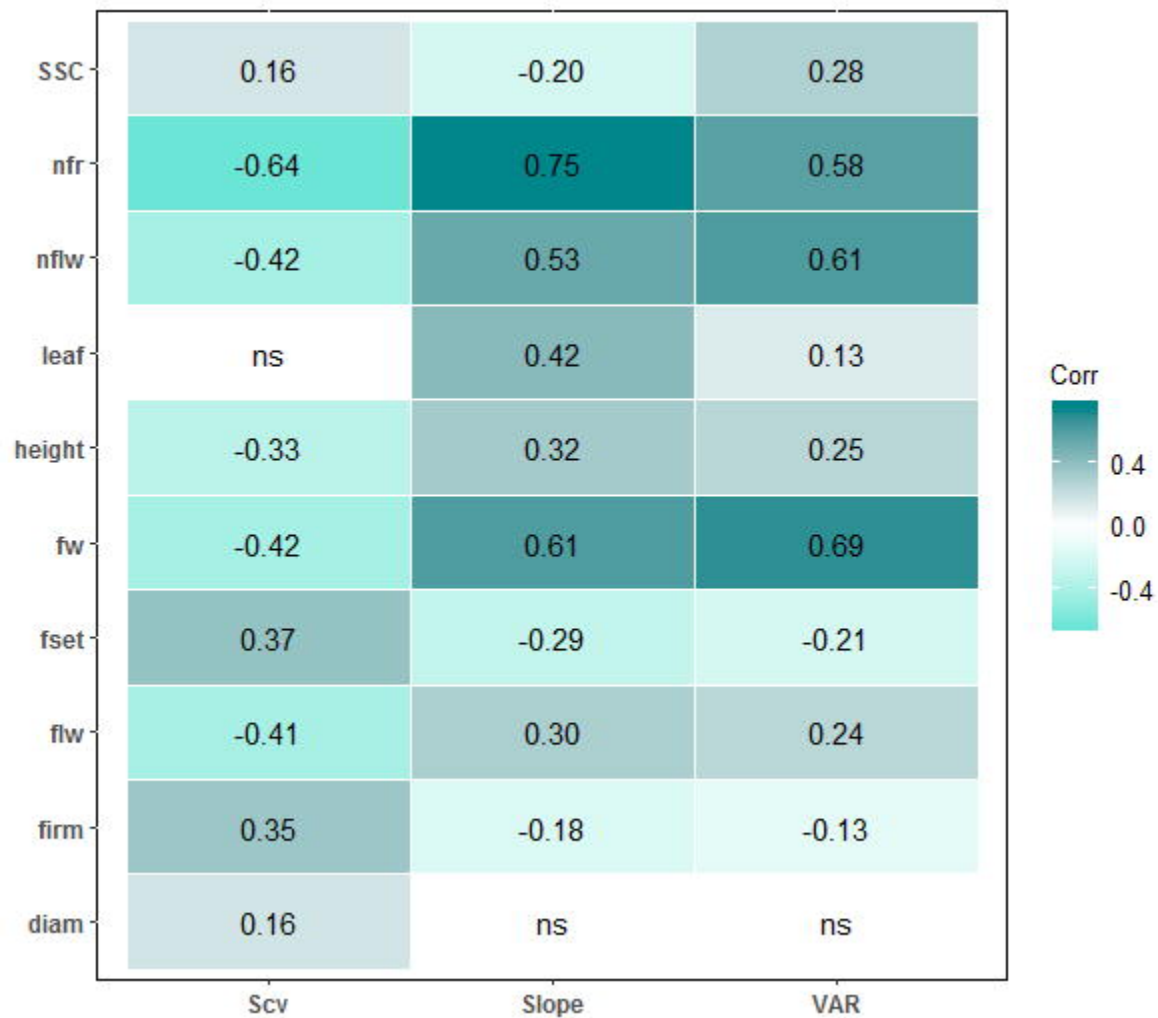

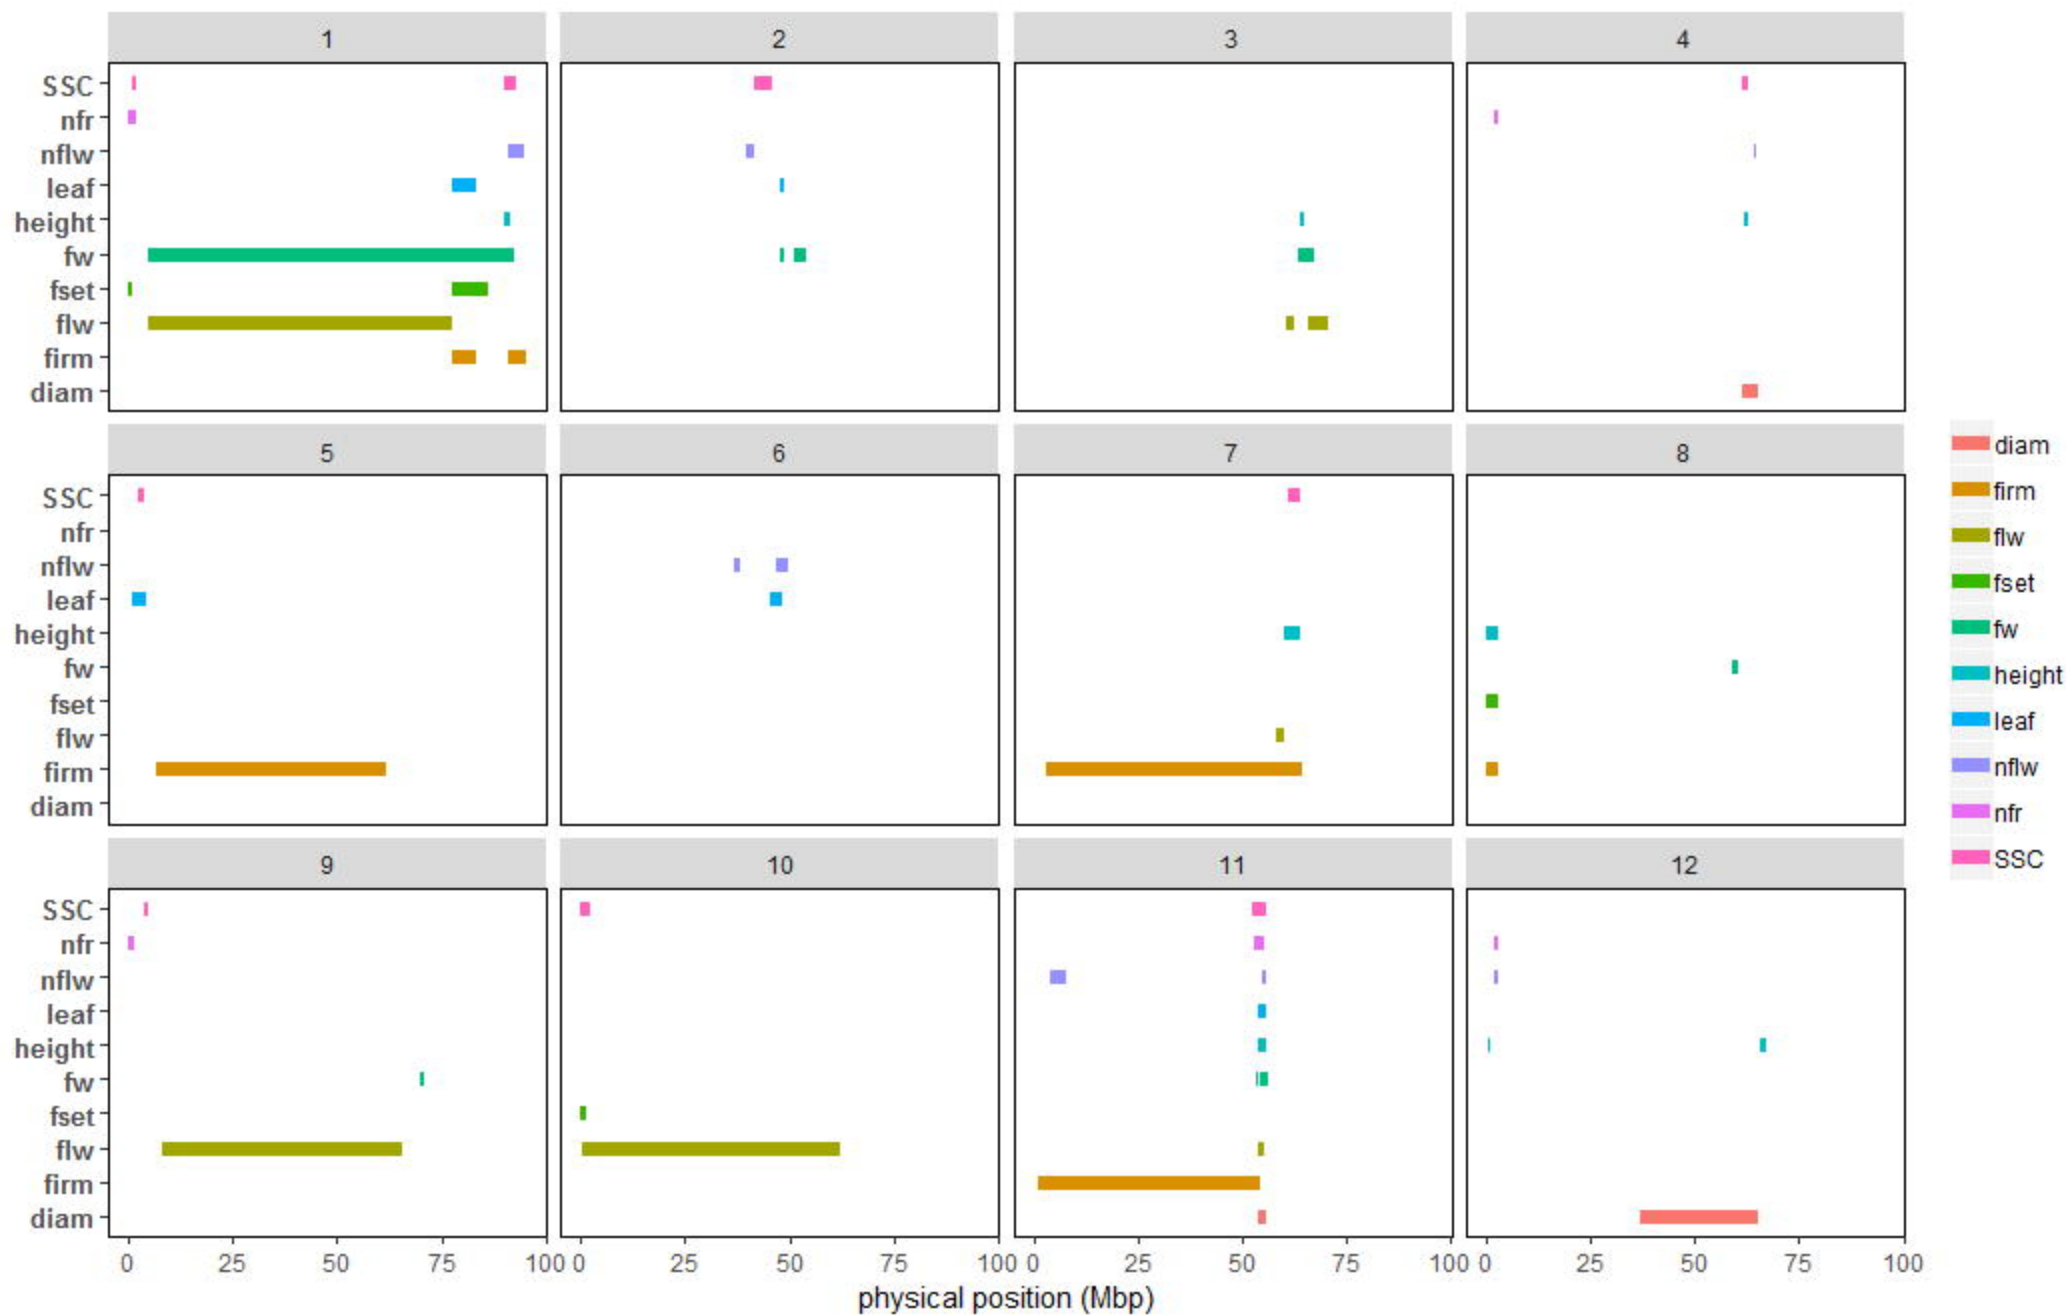

Source: https://www.biorxiv.org/content/biorxiv/early/2020/02/07/2020.02.07.938456.full.pdf
